# Supplementary material
Source: PubMed Central journal article supplement (PMC4762448)
Supplement: NIHMS758545-supplement-Supplemental.pdf [file NIHMS758545-supplement-Supplemental.pdf]

Table S1 Selected hit compounds

|    | Diversity/<br>NSC no. | Structure | Pharmacokinetic properties |                  |           |            | Pharmacodynamic properties |                       |                       |                       |                       |                       |                       |                         |                         |
|----|-----------------------|-----------|----------------------------|------------------|-----------|------------|----------------------------|-----------------------|-----------------------|-----------------------|-----------------------|-----------------------|-----------------------|-------------------------|-------------------------|
|    |                       |           | MW                         | Log P<br>(XLOGP) | HBD<br><5 | HBA<br><10 | RB                         | Ls- AChBP             |                       | Ac- AChBP             |                       | Bt- AChBP             |                       | Ligand Efficiency       |                         |
|    |                       |           |                            |                  |           |            |                            | Cluster#<br>(%member) | Docking<br>$\Delta G$ | Cluster#<br>(%member) | Docking<br>$\Delta G$ | Cluster#<br>(%member) | Docking<br>$\Delta G$ | Binding/<br>non H       | Docking/<br>non H       |
| 1  | 1917<br>NSC 600067    |           | 324                        | 1.16             | 0         | 2          | 5                          | 1 (91)                | -13.84                | 1 (27)<br>2 (70)      | -14.47<br>-13.0       | 1 (93)                | -13.03                | -0.51<br>-0.47<br>-0.47 | -0.58<br>-0.54<br>-0.54 |
| 2  | 0713<br>NSC 5 9486    |           | 326                        | 2.34             | 1         | 1          | 5                          | 1 (92)                | -13.05                | 1 (73)                | -12.75                | 1 (20)<br>2(33)       | -10.78<br>-10.6       | -0.53<br>-0.51<br>-0.42 | -0.57<br>-0.55<br>-0.46 |
| 3  | 1002<br>NSC 95926     |           | 447                        | 1.5              | 2         | 2          | 5                          | 1 (75)                | -12.81                | 1 (80)                | -11.72                | 1 (56)                | -10.83                | -0.40<br>-0.34<br>-0.31 | -0.43<br>-0.39<br>-0.36 |
| 4  | 1759<br>NSC326381     |           | 311                        | 3.04             | 2         | 4          | 5                          | 1 (100)               | -12.81                | 1 (38)                | -11.66                | 1 (23)<br>5 (56)      | -10.97<br>-9.05       | -0.51<br>-0.49<br>-0.35 | -0.58<br>-0.53<br>-0.41 |
| 5  | 1066<br>NSC102852     |           | 240                        | 0.55             | 0         | 4          | 4                          | 1 (100)               | -12.53                | 1 (100)               | -12.63                | 1 (98)                | -11.51                | -0.65<br>-0.65<br>-0.59 | -0.74<br>-0.74<br>-0.68 |
| 6  | 1922<br>NSC606535     |           | 314                        | -0.92            | 2         | 8          | 5                          | 1 (99)                | -12.47                | 1 (35)<br>2 (63)      | -11.63<br>-11.1       | 1 (84)                | -11.21                | -0.52<br>-0.45<br>-0.44 | -0.57<br>-0.51<br>-0.51 |
| 7  | 0763<br>NSC66183      |           | 220                        | -0.15            | 2         | 4          | 5                          | 1 (98)                | -12.31                | 1 (94)                | -12.55                | 1 (74)                | -10.73                | -0.65<br>-0.68<br>-0.56 | -0.77<br>-0.78<br>-0.67 |
| 8  | 1080<br>NSC105900     |           | 284                        | 3.34             | 1         | 3          | 5                          | 1 (77)                | -12.27                | 1 (60)                | -11.42                | 1 (71)                | -11.14                | -0.54<br>-0.51<br>-0.48 | -0.61<br>-0.57<br>-0.56 |
| 9  | 0498<br>NSC42258      |           | 417                        | 4.15             | 2         | 3          | 4                          | 1 (68)                | -12.12                | 1 (86)                | -11.46                | 1 (94)                | -11.82                | -0.43<br>-0.42<br>-0.39 | -0.47<br>-0.44<br>-0.45 |
| 10 | 0726<br>NSC61810      |           | 384                        | 0.56             | 1         | 4          | 5                          | 1 (84)                | -11.80                | 1 (52)                | -10.62                | 1 (57)                | -10.70                | -0.52<br>-0.50<br>-0.46 | -0.54<br>-0.48<br>-0.49 |
| 11 | 0797<br>NSC72861*     |           | 305                        | 1.50             | 1         | 4          | 5                          | 1 (78)                | -11.80                | 1 (55)                | -10.38                | 1 (52)                | -10.50                | -0.51<br>-0.49<br>-0.44 | -0.54<br>-0.47<br>-0.48 |

|    |                   |  |     |      |   |   |   |         |        |                  |                 |                  |                |                         |                         |
|----|-------------------|--|-----|------|---|---|---|---------|--------|------------------|-----------------|------------------|----------------|-------------------------|-------------------------|
| 12 | 0872<br>NSC83391  |  | 310 | 1.91 | 0 | 5 | 5 | 1 (95)  | -11.80 | 1 (91)           | -10.88          | 1 (97)           | -11.30         | -0.50<br>-0.47<br>-0.47 | -0.59<br>-0.54<br>-0.56 |
| 13 | 0155<br>NSC13378  |  | 358 | 3.0  | 2 | 4 | 4 | 1 (53)  | -11.74 | 1 (76)           | -12.13          | 1 (35)           | -10.78         | -0.50<br>-0.52<br>-0.45 | -0.56<br>-0.58<br>-0.51 |
| 14 | 0490<br>NSC41805  |  | 300 | 1.55 | 2 | 5 | 4 | 1 (85)  | -11.68 | 1 (20)<br>2 (36) | -10.42<br>-10.2 | 1 (91)           | -10.66         | -0.50<br>-0.43<br>-0.44 | -0.56<br>-0.49<br>-0.51 |
| 15 | 0584<br>NSC47938  |  | 345 | 4.83 | 0 | 4 | 5 | 1 (43)  | -11.68 | 1 (53)           | -10.47          | 1 (82)           | -10.68         | -0.42<br>-0.37<br>-0.39 | -0.45<br>-0.40<br>-0.41 |
| 16 | 1539<br>NSC190382 |  | 361 | 4.27 | 0 | 2 | 5 | 1 (82)  | -11.68 | 1 (52)           | -12.81          | 1 (69)           | -11.64         | -0.45<br>-0.48<br>-0.44 | -0.53<br>-0.58<br>-0.53 |
| 17 | 1040<br>NSC99676  |  | 346 | 2.36 | 1 | 1 | 5 | 1 (65)  | -11.66 | 1 (32)<br>2 (41) | -12.02<br>-10.5 | 1 (19)<br>2 (64) | -10.59<br>-9.8 | -0.43<br>-0.39<br>-0.35 | -0.51<br>-0.46<br>-0.43 |
| 18 | 0307<br>NSC24048  |  | 442 | 4.7  | 1 | 3 | 4 | 1 (80)  | -11.65 | 1 (30)<br>2 (67) | -11.56<br>-10.4 | 1 (53)           | -10.12         | -0.47<br>-0.39<br>-0.38 | -0.48<br>-0.44<br>-0.42 |
| 19 | 1131<br>NSC112796 |  | 268 | 3.01 | 1 | 3 | 5 | 1 (85)  | -11.58 | 1 (71)           | -11.78          | 1 (99)           | -10.68         | -0.48<br>-0.53<br>-0.45 | -0.58<br>-0.59<br>-0.53 |
| 20 | 0250<br>NSC18877  |  | 406 | 4.86 | 0 | 5 | 4 | 1 (99)  | -11.56 | 1 (68)           | -10.64          | 1 (71)           | -11.86         | -0.37<br>-0.37<br>-0.38 | -0.41<br>-0.38<br>-0.42 |
| 21 | 0384<br>NSC33052* |  | 314 | 6.4  | 0 | 0 | 4 | 1 (100) | -11.51 | 1 (100)          | -11.21          | 1 (79)           | -10.51         | -0.44<br>-0.42<br>-0.42 | -0.50<br>-0.49<br>-0.46 |
| 22 | 0038<br>NSC3535   |  | 253 | 2.82 | 0 | 3 | 5 | 1 (94)  | -11.47 | 1 (99)           | -11.03          | 1 (89)           | -10.59         | -0.56<br>-0.54<br>-0.52 | -0.67<br>-0.65<br>-0.62 |
| 23 | 0863<br>NSC81747  |  | 279 | 4.89 | 1 | 1 | 5 | 1 (100) | -11.45 | 1 (76)           | -11.36          | 1 (100)          | -11.30         | -0.50<br>-0.49<br>-0.49 | -0.57<br>-0.57<br>-0.56 |
| 24 | 1975<br>NSC668394 |  | 452 | 3.74 | 2 | 5 | 5 | 1 (75)  | -11.42 | 1 (55)           | -10.64          | 1 (36)           | -10.43         | -0.42<br>-0.40<br>-0.37 | -0.48<br>-0.44<br>-0.43 |

|    |                   |                                                                                     |     |      |   |   |   |                  |                 |                  |                 |                  |                 |                         |                         |
|----|-------------------|-------------------------------------------------------------------------------------|-----|------|---|---|---|------------------|-----------------|------------------|-----------------|------------------|-----------------|-------------------------|-------------------------|
| 25 | 0342<br>NSC27476  | 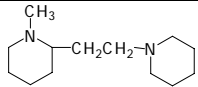   | 283 | 2.04 | 0 | 3 | 3 | 1 (100)          | -11.39          | 1 (100)          | -11.45          | 1 (100)          | -10.65          | -0.68<br>-0.69<br>-0.63 | -0.76<br>-0.76<br>-0.71 |
| 26 | 1304<br>NSC130876 |    | 299 | 1.17 | 2 | 4 | 4 | 1 (89)           | -11.27          | 1 (47)           | -11.09          | 1 (63)           | -11.59          | -0.43<br>-0.42<br>-0.44 | -0.49<br>-0.48<br>-0.50 |
| 27 | 1823<br>NSC360218 |    | 361 | 1.45 | 1 | 4 | 4 | 1 (40)<br>2 (60) | -11.25<br>-10.4 | 1 (1)<br>2 (78)  | -11.36<br>-9.53 | 1 (98)           | -10.77          | -0.46<br>-0.48<br>-0.44 | -0.50<br>-0.51<br>-0.51 |
| 28 | 0410<br>NSC35582  |    | 347 | 3.91 | 0 | 2 | 4 | 1 (99)           | -11.20          | 1 (80)           | -11.98          | 1 (67)           | -10.58          | -0.47<br>-0.51<br>-0.43 | -0.53<br>-0.57<br>-0.50 |
| 29 | 0395<br>NSC34352  |    | 504 | 4.3  | 1 | 2 | 5 | 1 (100)          | -11.19          | 1 (38)           | -11.12          | 1 (40)<br>2 (50) | -11.03<br>-10.2 | -0.41<br>-0.39<br>-0.35 | -0.43<br>-0.43<br>-0.39 |
| 30 | 0689<br>NSC56939  |    | 346 | 3.65 | 0 | 1 | 4 | 1 (98)           | -11.15          | 1 (62)           | -11.42          | 1 (76)           | -10.93          | -0.45<br>-0.44<br>-0.45 | -0.48<br>-0.50<br>-0.48 |
| 31 | 1678<br>NSC303530 |    | 292 | 4.28 | 0 | 4 | 3 | 1 (96)           | -11.14          | 1 (51)           | -10.39          | 1 (71)           | -11.07          | -0.45<br>-0.41<br>-0.43 | -0.48<br>-0.45<br>-0.48 |
| 32 | 1507<br>NSC174201 |    | 364 | 3.06 | 1 | 3 | 4 | 1 (22)<br>3 (63) | -11.05<br>-10.7 | 1 (9)<br>2 (79)  | -10.98<br>-10.3 | 1 (99)           | -10.77          | -0.47<br>-0.45<br>-0.48 | -0.54<br>-0.52<br>-0.54 |
| 33 | 1255<br>NSC122451 |   | 241 | 2.86 | 2 | 3 | 5 | 1 (38)<br>4 (50) | -11.04<br>-9.64 | 1 (23)<br>2 (54) | -10.66<br>-9.38 | 1 (71)           | -10.23          | -0.45<br>-0.48<br>-0.48 | -0.54<br>-0.57<br>-0.57 |
| 34 | 1607<br>NSC246981 |  | 280 | 2.99 | 0 | 1 | 5 | 1 (13)<br>2 (34) | -11.02<br>-10.6 | 1 (100)          | -10.48          | 1 (81)           | -10.48          | -0.52<br>-0.50<br>-0.50 | -0.59<br>-0.58<br>-0.58 |
| 35 | 1871<br>NSC373058 |  | 328 | 4.93 | 1 | 3 | 4 | 1 (92)           | -11.01          | 1 (20)<br>2 (41) | -10.71<br>-10.5 | 1 (37)           | -10.86          | -0.42<br>-0.41<br>-0.40 | -0.44<br>-0.42<br>-0.43 |
| 36 | 1887<br>NSC380540 |  | 254 | 1.00 | 1 | 4 | 4 | 1 (48)           | -11.01          | 1 (79)           | -11.14          | 1 (50)           | -10.68          | -0.51<br>-0.55<br>-0.47 | -0.61<br>-0.62<br>-0.59 |
| 37 | 0260<br>NSC19496  |  | 256 | 0.64 | 1 | 4 | 3 | 1 (65)           | -11.00          | 1 (67)           | -10.54          | 1 (92)           | -10.31          | -0.61<br>-0.59<br>-0.57 | -0.69<br>-0.66<br>-0.64 |

|    |                   |  |     |      |   |   |   |                  |                 |                  |                 |                  |                 |                         |                         |
|----|-------------------|--|-----|------|---|---|---|------------------|-----------------|------------------|-----------------|------------------|-----------------|-------------------------|-------------------------|
| 38 | 0679<br>NSC55462  |  | 286 | 1.62 | 1 | 1 | 5 | 1 (4)<br>4 (79)  | -11.00<br>-10.1 | 1 (34)           | -10.97          | 1 (20)<br>2 (77) | -10.48<br>-10.3 | -0.44<br>-0.46<br>-0.44 | -0.51<br>-0.55<br>-0.52 |
| 39 | 1281<br>NSC126347 |  | 328 | 2.26 | 0 | 3 | 3 | 1 (51)           | -10.99          | 1 (32)<br>2 (42) | -10.34<br>-10.0 | 1 (86)           | -10.30          | -0.50<br>-0.45<br>-0.47 | -0.55<br>-0.50<br>-0.51 |
| 40 | 1468<br>NSC166302 |  | 196 | 1.80 | 1 | 2 | 3 | 1 (100)          | -10.98          | 1 (100)          | -11.06          | 1 (100)          | -10.18          | -0.70<br>-0.71<br>-0.64 | -0.78<br>-0.79<br>-0.73 |
| 41 | 0581<br>NSC47924  |  | 279 | 4.15 | 2 | 3 | 4 | 1 (85)           | -10.97          | 1 (100)          | -10.43          | 1 (63)           | -10.36          | -0.47<br>-0.39<br>-0.45 | -0.52<br>-0.45<br>-0.49 |
| 42 | 0817<br>NSC74429  |  | 308 | 2.99 | 4 | 2 | 4 | 1 (6)<br>2 (73)  | -10.97<br>-10.3 | 1 (21)<br>2 (79) | -11.58<br>-9.76 | 1 (72)           | -10.61          | -0.45<br>-0.41<br>-0.43 | -0.47<br>-0.44<br>-0.48 |
| 43 | 0421<br>NSC36369  |  | 474 | 4.8  | 0 | 1 | 5 | 1 (91)           | -10.96          | 1 (31)<br>2 (69) | -11.81<br>-11.5 | 1 (79)           | -11.33          | -0.41<br>-0.42<br>-0.42 | -0.46<br>-0.48<br>-0.47 |
| 44 | 0291<br>NSC23082  |  | 270 | 2.46 | 1 | 1 | 4 | 1 (6)<br>3 (80)  | -10.91<br>-10.5 | 1 (17)<br>2 (71) | -10.57<br>-10.2 | 1 (87)           | -10.18          | -0.47<br>-0.47<br>-0.47 | -0.55<br>-0.54<br>-0.54 |
| 45 | 1434<br>NSC158011 |  | 309 | 4.75 | 1 | 0 | 5 | 1 (87)           | -10.84          | 1 (25)<br>2 (66) | -10.77<br>-10.1 | 1 (84)           | -10.30          | -0.44<br>-0.41<br>-0.41 | -0.52<br>-0.48<br>-0.49 |
| 46 | 1303<br>NSC130843 |  | 317 | -0.1 | 2 | 3 | 4 | 1 (35)           | -10.82          | 1 (38)<br>2 (40) | -11.29<br>-10.7 | 1 (82)           | -10.12          | -0.48<br>-0.47<br>-0.44 | -0.54<br>-0.54<br>-0.51 |
| 47 | 1041<br>NSC99785  |  | 244 | 1.84 | 2 | 3 | 4 | 1 (46)           | -10.81          | 1 (60)           | -10.81          | 1 (66)           | -10.55          | -0.56<br>-0.55<br>-0.53 | -0.60<br>-0.60<br>-0.59 |
| 48 | 0007<br>NSC1199   |  | 225 | 3.35 | 1 | 2 | 4 | 1 (99)           | -10.79          | 1 (98)           | -10.34          | 1 (100)          | -10.31          | -0.63<br>-0.60<br>-0.59 | -0.67<br>-0.65<br>-0.64 |
| 49 | 0437<br>NSC37372  |  | 294 | 2.6  | 0 | 2 | 3 | 1 (21)<br>2 (60) | -10.76<br>-10.4 | 1 (10)<br>3 (76) | -10.97<br>-10.1 | 1 (88)           | -10.89          | -0.51<br>-0.48<br>-0.52 | -0.55<br>-0.54<br>-0.57 |
| 50 | 0617<br>NSC49455  |  | 301 | 3    | 0 | 1 | 5 | 1 (87)           | -10.70          | 1 (62)           | -10.75          | 1 (97)           | -10.89          | -0.46<br>-0.46<br>-0.47 | -0.53<br>-0.54<br>-0.54 |

|    |                   |                                                                                   |     |      |   |   |   |         |        |         |        |         |        |                         |                         |
|----|-------------------|-----------------------------------------------------------------------------------|-----|------|---|---|---|---------|--------|---------|--------|---------|--------|-------------------------|-------------------------|
| 51 | 1679<br>NSC303534 | 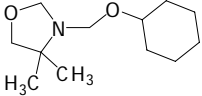 | 213 | 2.45 | 0 | 3 | 3 | 1 (100) | -10.49 | 1 (100) | -10.78 | 1 (100) | -10.00 | -0.62<br>-0.65<br>-0.60 | -0.70<br>-0.72<br>-0.67 |
|----|-------------------|-----------------------------------------------------------------------------------|-----|------|---|---|---|---------|--------|---------|--------|---------|--------|-------------------------|-------------------------|
